# Supplementary material for: Quantitative Parameters from OCT Angiography in Patients with Diabetic Retinopathy and in Those with Only Peripheral Retinopathy Compared with Control Participants
Source: PubMed Central journal article supplement — Ophthalmol Sci. 2021 May 26;1(2):100030. doi: 10.1016/j.xops.2021.100030 (PMC9559874; doi:10.1016/j.xops.2021.100030), 2021-05-26
Supplement: mmc1.pdf [file mmc1.pdf]

Supplementary Figure 1: Heidelberg SPECTRALIS OCTA Quality Score (Q Score) versus manual quality assessment.

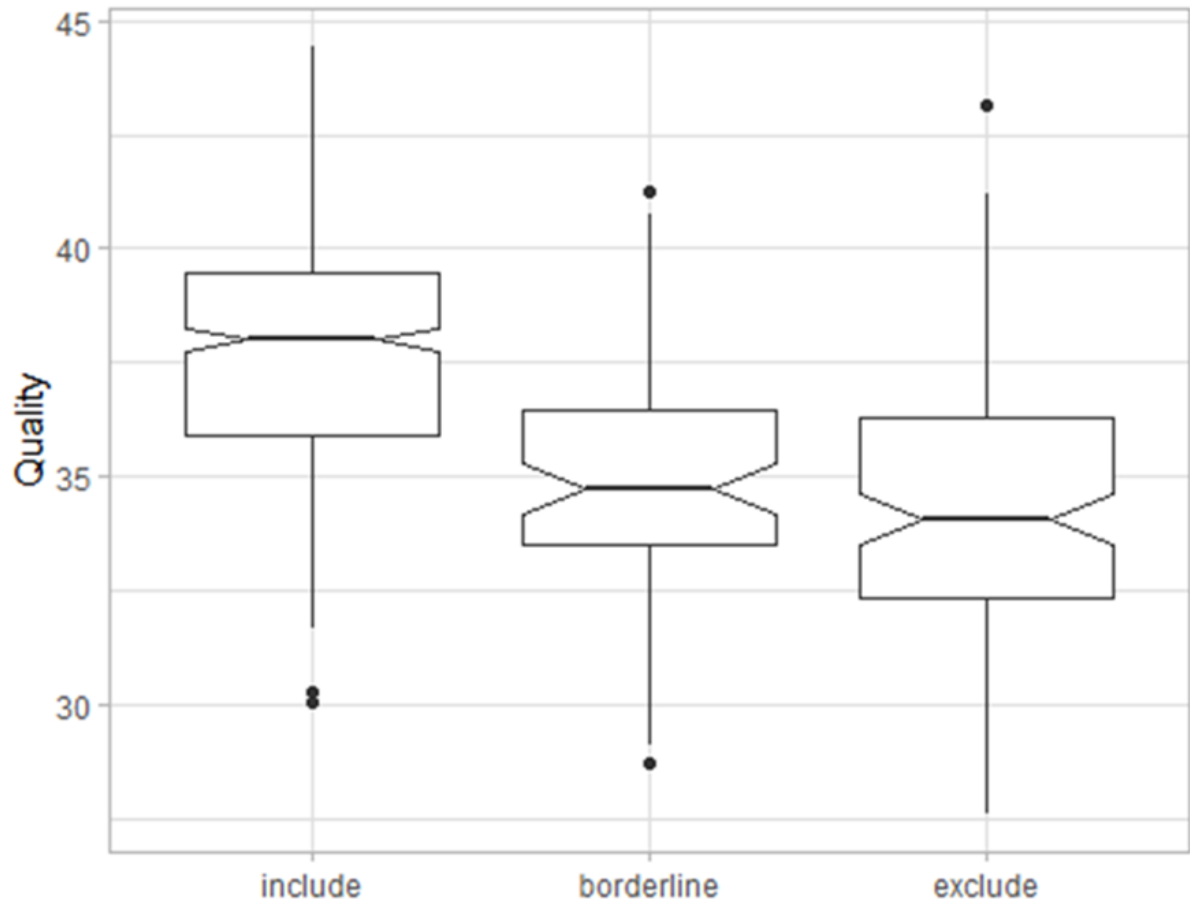

Supplementary Figure 2 Example OCT A image showing FAZ measurements.

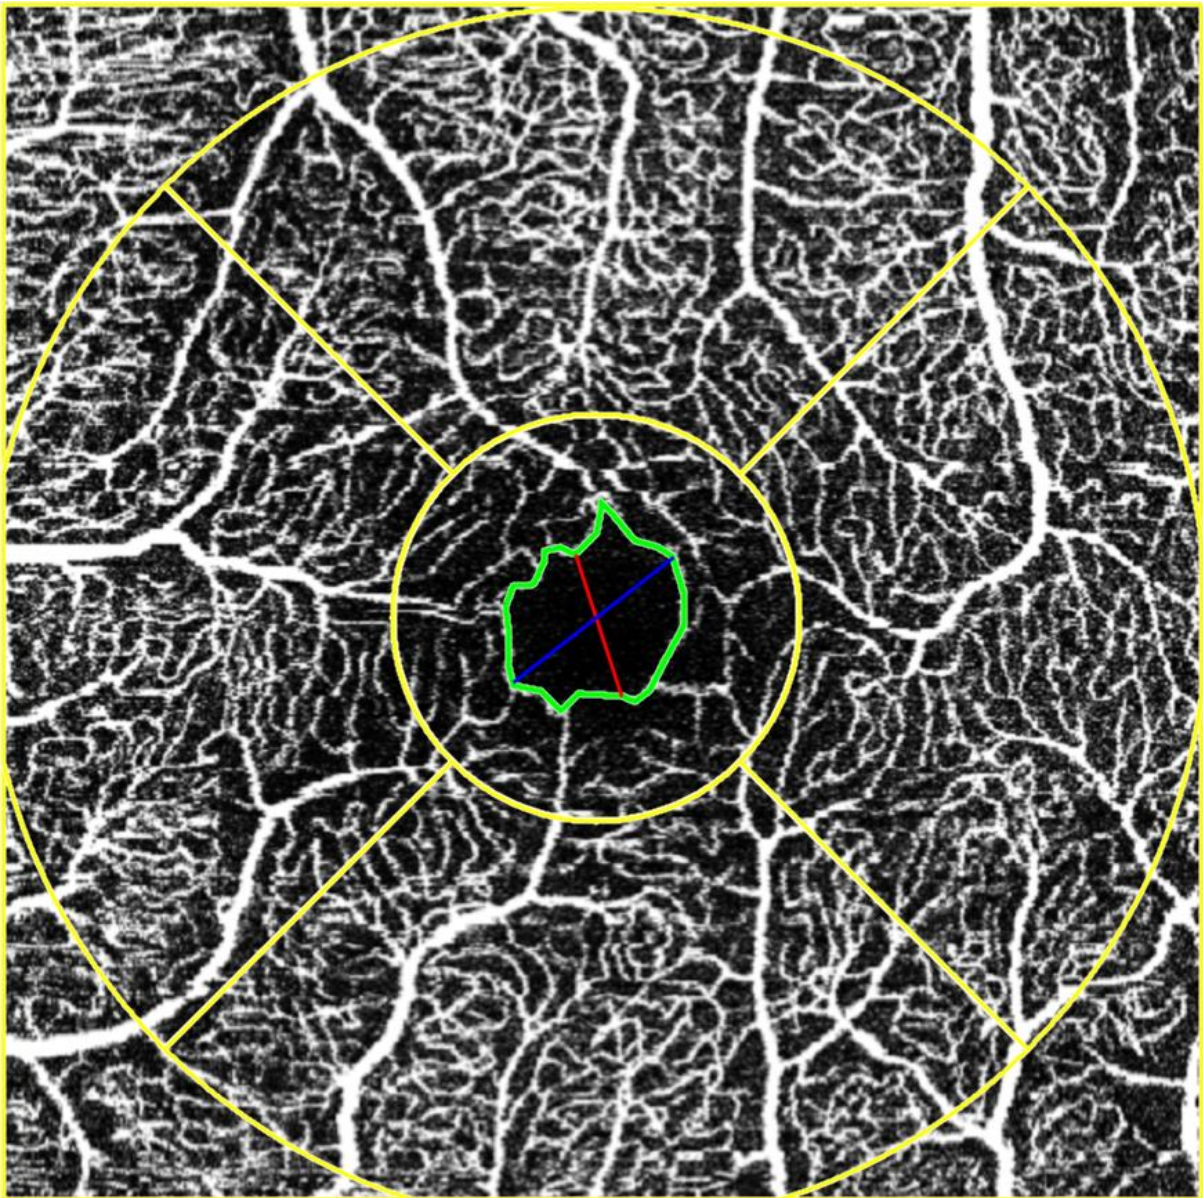

*Yellow grid: EDTRS grid, green: FAZ outline, red line: FAZ min diameter, blue line: FAZ max diameter.*
